1 **Methylglyoxal induces nuclear accumulation of p53 and**  
2 **γH2AX in normal and cancer cells**

3

4 Astrid Veß<sup>1</sup>, Thomas Hollemann<sup>1,\*</sup>

5

6 <sup>1</sup> Institute for Physiological Chemistry, Medical Faculty, Martin Luther University Halle-

7 Wittenberg, Halle (Saale), Germany

8

9

10

11 \* Corresponding author

12 Email: [thomas.hollemann@medizin.uni-halle.de](mailto:thomas.hollemann@medizin.uni-halle.de)

13

14

15

16

17

18

19

20

21

22

23

24

25

## 26 **Abstract**

27 The formation and accumulation of methylglyoxal (MGO) is associated with age-related  
28 diseases such as diabetes, cancer and neurodegenerative disorders. MGO is the major  
29 precursor of non-enzymatic glycation of macromolecules affecting their function and  
30 structure. We now show for the first time that MGO stress not only led to cellular aging  
31 responses like DNA double-strand breaks indicated by an accumulation of  $\gamma$ H2AX in the  
32 nucleus. We also observed an immediate increase of Ser15 phosphorylated p53 in the nucleus  
33 of MGO treated cell lines which will change the cellular expression pattern with adverse  
34 effects on the cell cycle and other cellular functions not necessarily related to aging.

## 35 **Introduction**

36 The formation and accumulation of methylglyoxal (MGO), the most potent glycating agent in  
37 humans, is associated with age-related diseases such as diabetes, obesity, atherosclerosis,  
38 cancer and neurodegenerative disorders [1]. Methylglyoxal is mainly formed by the non-  
39 enzymatic degradation of triose phosphates, glyceraldehyde-3-phosphate (G3P) and  
40 dihydroxyacetone-phosphate (DHAP), as a byproduct of glycolysis. It takes place in all cells  
41 and organisms. [2, 3]. The actual concentration of MGO in the cell depends on several factors  
42 like the rate of detoxification by glyoxalases, the phosphate pool of the cell and the rate of  
43 influx of carbon sources [4].

44 MGO is the major precursor of non-enzymatic glycation of proteins, lipids and DNA,  
45 subsequently leading to the formation of a heterogeneous group of molecules, collectively  
46 called AGEs (advanced glycation endproducts) [1, 3, 5]. The glycation reactions can cause

47 the formation of complexes and irreversible adducts of these macromolecules affecting their  
48 function and structure. Accumulation of AGEs compromises cellular processes resulting in  
49 mitochondrial dysfunction, genomic instability, loss of proteostasis, inflammaging and  
50 cellular senescence [6]. Moreover, other studies revealed that elevated MGO levels may also  
51 have beneficial effects in cancer and lifespan [7, 8].

52 Tumor cells differ from non-tumor cells concerning their high glycolytic rates under  
53 anaerobic conditions (Warburg effect). This inefficient energy production, cause a high rate  
54 of glucose uptake and glycolysis in tumors resulting in elevated MGO levels [9]. Loarca *et al.*  
55 reported that treatment of hepatocellular carcinoma (HCC) cell lines with MGO promote the  
56 localization of p53 into the nucleus whereas total cellular p53 levels are not altered [10]. p53  
57 is a well-known tumor suppressor that is mutated in many tumor cells [11]. It functions as a  
58 transcription factor, which is involved in the regulation of the cell cycle, DNA repair and  
59 apoptosis. Upon cellular stress such as DNA damage, hypoxia or viral infection p53 is  
60 activated and stabilized by different post-translational modifications interfering with its  
61 degradation [12]. It was shown that DNA damage induces phosphorylation of p53 on Ser15  
62 [13]. This impairs the binding to MDM2, promoting the activation of p53 and thereby leading  
63 to cell cycle arrest or apoptosis [14, 15].

64 Using several tumor and non-tumor cell lines we showed that MGO stress led to DNA  
65 double-strand breaks, and an immediate increase of Ser15 phosphorylated p53 in the nucleus.  
66 This upregulation of nuclear phospho-p53 seems not accompanied with an increase in  
67 apoptosis rate but will likely activate p53 dependent signaling pathways and thereby change  
68 the cellular expression pattern with adverse effects on the cell cycle and other cellular  
69 functions. The application of MGO as a compound to mimic increased glycation in cells is a

70 widely accepted method particular in the aging research field. Therefore, we suggest  
71 monitoring phosphorylated p53 and  $\gamma$ H2AX in MGO treated cells in age related issues to  
72 exclude p53 signaling interfering with age response.

## 73 **Materials and methods**

### 74 **Reagents**

75 Methylglyoxal (MGO) was purchased from Sigma-Aldrich (catalog no. M0252). Primary  
76 antibodies used were anti-phospho-p53 (Cell Signalling, catalog no. 9286), anti-p53 (Santa  
77 Cruz), anti-phospho-Histone H2A.X (Ser139) clone JBW301 (Millipore, catalog no. 05-636),  
78 anti-cleaved caspase3 (5A1E) (Cell Signalling, catalog no.9664) and anti-PARP (Cell  
79 Signalling, catalog no.9542). F-actin was visualized with Atto 546 Phalloidin (Sigma-  
80 Aldrich). Alexa Fluor-conjugated and IRDye® (800CW, 680RD) secondary antibodies were  
81 from Thermo Fisher Scientific or Li-Cor (Bad Homburg, Germany), respectively. DNA was  
82 stained with DAPI (Sigma-Aldrich).

### 83 **Cell Culture and Methylglyoxal (MGO) treatment**

84 The breast cancer cell line MDA-MB-468 was cultured at 37°C and 5% CO<sub>2</sub> in RPMI  
85 medium supplemented with 10% (v/v) fetal calf serum (FCS) and Antibiotic-Antimycotic  
86 (Thermo Fisher Scientific, Schwerte, Germany). The keratinocyte cell line HaCaT, cervical  
87 adenocarcinoma Hela cells and neuroblastoma SH-SY5Y cells were cultured at 37°C and 5%  
88 CO<sub>2</sub> in DMEM high glucose medium supplemented with 10% (v/v) fetal calf serum (FCS),  
89 10% sodium pyruvate and Antibiotic-Antimycotic (Thermo Fisher Scientific). Primary  
90 human fibroblasts were cultured at 37°C and 5% CO<sub>2</sub> in Dulbecco's Modified Eagle Medium

91 (DMEM)/Hams F12 supplemented with 8% (v/v) fetal calf serum (FCS), 2% Ultrosor G  
92 (PALL Life Sciences) and 2 mM L-glutamine (Thermo Fisher Scientific).

93 In all experiments Methylglyoxal (MGO) (Sigma-Aldrich) was diluted to 0.1 mM, 0.5 mM or  
94 1 mM and the cells were incubated for 1h and 18h respectively.

## 95 **Immunofluorescence and Microscopy**

96 For immunofluorescence analysis,  $8 \times 10^4$  cells (12-well plates) were grown on glass  
97 coverslips, treated with 0.5 mM or 1 mM MGO for 1h and 18h respectively, washed twice  
98 with PBS, fixed with 3.7% formaldehyde in PBS for 15 min, permeabilized with 0.2% (v/v)  
99 Triton X-100 in PBS for 10 min and blocked in 10% FCS/1% BSA/0.05% Triton X-100 (v/v)  
100 in PBS for 30 min. Primary antibodies were diluted 1:200 and incubated for 1 h at room  
101 temperature. Alexa-conjugated secondary antibodies were diluted 1:200 and applied for 1 h at  
102 room temperature. Samples were covered with ProLong Gold antifade reagent (Life  
103 Technologies) and imaged using an Apotome-containing Axio Observer.Z1 (Zeiss, Jena,  
104 Germany) equipped with a 63x oil objective and a monochrome Axiocam MRm camera.  
105 Representative images are shown.

## 106 **Apoptosis assay**

107  $2 \times 10^5$  cells were subjected to the Caspase-3/CPP32 Fluorometric Assay Kit (BioVision)  
108 according to the manufacturer's protocol. Absorbance at 505 nm was measured after 2 h of  
109 incubation at 37°C using a microplate reader. Quantitative results were calculated from at  
110 least three independent biological experiments.

## 111 **Western Blot**

112 Cells were washed twice with ice-cold phosphate-buffered saline and lysed in RIPA buffer  
113 (50 mM Tris-HCl, pH 7.4, 150 mM NaCl, 2 mM EDTA, 1% (v/v) Triton X-100, 0.1% SDS,  
114 Complete EDTA-free protease inhibitor cocktail) for 30 min on ice. The proteins were  
115 separated on SDS-PAGE, transferred to polyvinylidene fluoride (PVDF) membranes (Merck  
116 Millipore), incubated with indicated primary antibodies used at 1:200–1:5000 dilutions and  
117 incubated overnight at 4°C. Fluorophore-labeled secondary antibodies used at 1:10.000  
118 dilutions (LI-COR, Bad Homburg, Germany) were incubated for 1 h at room temperature.  
119 The fluorescence signals were detected with ODYSSEY CLx (LI-COR) and quantified by the  
120 associated software. Quantitative results were calculated from at least three independent  
121 biological experiments.

## 122 **Results and Discussion**

123 In this study we analyzed the impact of the glycating agent Methylglyoxal on the  
124 phosphorylation of p53 at Ser-15 and its subsequent translocation to the nucleus. We  
125 compared different non-tumor and tumor cell lines to figure out if this response to MGO is  
126 rather a more general than a cell-type specific (depending on the genetic background) answer.  
127 Here we treated non-tumor cell lines (HaCaT keratinocytes, primary fibroblasts) and tumor  
128 cells (cervical adenocarcinoma Hela cells, breast cancer MDA-MB-468 cells and  
129 neuroblastoma SH-SY5Y cells) with concentrations of MGO between 0.1 mM and 1 mM  
130 which are generally used in this research field. The localization of Ser-15 phosphorylated p53  
131 was analyzed 1 h and 18 h after treatment in the above mentioned cell lines. In non-tumor  
132 cells (HaCaT cells) as well as in tumor cells (MDA-MB-468 cells) MGO treatment caused a  
133 significant increase of Ser15 phosphorylated p53 in the nucleus (Fig 1A-D). We found that

134 MGO increased nuclear phospho-p53 levels up to ~67 fold in HaCaT cells and up to ~1.8  
135 fold in MDA-MB-468 cells (Fig 2). However, in Hela cells and primary human fibroblasts,  
136 MGO treatment had no effect on the localization of phospho-p53 (S1 Fig; data not shown)  
137 and in SH-SY5Y cells the nuclear localization of phospho-p53 is already very high without  
138 MGO treatment (data not shown).

139 **Fig 1. Analysis of the expression and localization of phospho-p53 in HaCaT cells and**  
140 **breast cancer MDA-MB-468 cells after treatment with MGO.** Representative images of  
141 HaCaT (A,B), MDA-MB-468 cells (C,D) treated with indicated MGO concentrations for 1h  
142 (A,C) and 18 h (B,D). The cells were stained for phospho-p53 together with phalloidin (F-  
143 actin). Merged images show phospho-p53 (green) and F-actin (red). Scale bars, 20  $\mu$ m.

144 **Fig 2. MGO treatment results in an increase in nuclear localized phospho-p53 in**  
145 **HaCaT and MDA-MB-468 cells.** Percentage of cells showing nuclear localization of  
146 phospho-p53 normalized to the total cell number. All error bars represent  $\pm$  SEM,  $n \geq 2$ ,  $N > 50$ .  
147 All *P*-values were calculated using an unpaired two-sample Student's *t*-test ( $*P \leq 0.05$ ,  
148  $**P \leq 0.01$ ).

149 It was shown previously that MGO is a cytotoxic agent, which can lead to apoptosis in cancer  
150 cells through the generation of ROS [16], DNA modification and DNA-protein crosslink  
151 [17]. To answer the question if DNA damage esp. DSBs induced by MGO is a prerequisite  
152 for the increase in nuclear localization of phospho-p53 we determined the phosphorylation  
153 level of histone H2AX in HaCaT cells and human primary fibroblasts upon MGO treatment.  
154 Phosphorylated H2AX ( $\gamma$ H2AX) specifically binds to damaged DNA and can be visualized  
155 via immunofluorescence staining. Upon binding of  $\gamma$ H2AX to damaged DNA several proteins

156 are recruited for instance BRCA1 and p53 binding protein1 to induce DNA repair [18]. We  
157 could demonstrate that MGO treatment already after 1 h increased nuclear  $\gamma$ H2AX  
158 accumulation in HaCaT cells and human primary fibroblasts (Fig 3 and 4). Since in human  
159 primary fibroblasts, MGO treatment does not lead to nuclear p53 translocation, DNA double  
160 strand breaks seem to be not sufficient to trigger nuclear localization of phospho-p53.

161 **Fig 3. Analysis of DNA double-strand breaks and apoptosis rate in HaCaT cells after**  
162 **treatment with MGO.** Representative images of HaCaT cells treated with indicated MGO  
163 concentrations for 1h (A) and 18h (B). The cells were stained for  $\gamma$ H2AX together with  
164 cleaved caspase. Merged images show  $\gamma$ H2AX (green), cleaved caspase (red) and DNA  
165 (blue). Scale bars, 20  $\mu$ m. C. Apoptosis rate in HaCaT cells by measuring caspase-3 activity  
166 using the Caspase-3/ CPP32 Fluorometric Assay Kit. All error bars represent  $\pm$  SEM, n=3. D.  
167 Representative western blot of PARP in total cell lysates treated with indicated MGO  
168 concentrations for 18h. GAPDH was used as a loading control. Quantification of PARP  
169 protein levels normalized to GAPDH. All error bars represent  $\pm$  SEM, n=3.

170 **Fig 4. Analysis of DNA double-strand breaks and apoptosis rate in primary human**  
171 **fibroblasts after treatment with MGO.** A. Representative images of primary human  
172 fibroblasts treated with indicated MGO concentrations for 1h. The cells were stained for  
173  $\gamma$ H2AX together with cleaved caspase. Merged images show  $\gamma$ H2AX (green), cleaved  
174 caspase (red) and DNA (blue). Scale bars, 20  $\mu$ m. B. Apoptosis rate in primary human  
175 fibroblasts after treatment with indicated MGO concentrations for 1 h by measuring caspase-  
176 3 activity using the Caspase-3/ CPP32 Fluorometric Assay Kit. All error bars represent  $\pm$   
177 SEM, n=3.



178 High levels of activated p53 may drive cells into an apoptotic fate. Thus we asked whether  
179 the number of apoptotic cells is altered upon MGO treatment. To this end, expression and  
180 activity of Caspase3 and PARP cleavage was investigated. We could demonstrate that upon  
181 treatment of HaCaT cells and human primary fibroblasts with MGO the apoptotic rate was  
182 not significantly changed (Fig 3A-C, Fig 4). Also PARP as one of the main cleavage target of  
183 caspase3 in vivo ([19]) was not affected (Fig 3D).

184 p53 is activated upon many different stress factors influencing important cellular processes  
185 either positively or negatively depending on the cellular context [20, 21]. Therefore, p53 is  
186 thought to be required for the maintenance of cellular and particularly genomic integrity. This is  
187 supported by the finding, that 50% of human tumors carry loss of function mutations in the  
188 p53 gene [11, 22-25]. 95% of these detected mutations are located in the DNA binding  
189 domain of p53 [26]. In the cell lines we used in this study MGO treatment leads to different  
190 p53 responses. Only in HaCat and MDA-MB-468 cells MGO treatment causes increased  
191 accumulation of Ser15 phosphorylated p53 in the nucleus. Interestingly in these cell lines the  
192 p53 gene carries mutations in the DNA binding domain altering its ability to bind to p53  
193 response elements and thereby changing its transcriptional activity. The MDA-MB-468 cell  
194 line is hemizygous for a mutated p53 gene (R273C) [11, 27]. Whereas the spontaneously  
195 immortalized skin keratinocyte cell line, HaCaT, possesses three point mutations (H179Y,  
196 D281G, R282W) of p53 on both alleles [28]. In contrast to that, HeLa cells and probably also  
197 primary fibroblasts which show no change in the nuclear localization of Ser15  
198 phosphorylated p53 possess exclusively wild type alleles of p53. In these cells it is supposed  
199 that other mechanisms may lead to a carcinogenic inactivation of p53, for instance HPV  
200 infection for cervical carcinoma or increase in protein stability in neuroblastoma [29, 30].

201 In summary, in this study we showed for the first time that MGO stress leads to an immediate  
202 increase of Ser15 phosphorylated p53 in the nucleus of several cell lines. This upregulation of  
203 nuclear phospho-p53 seems not accompanied with an increase in apoptosis rate but will likely  
204 activate p53 dependent signaling pathways. This would fit with recently published data  
205 showing an activation of the p53 pathway upon MGO treatment in human umbilical vein  
206 endothelial cells (HUVECs) [31]. Moreover, it was shown that the total amount of nuclear  
207 p53 is increased in hepatocellular carcinoma cells upon MGO treatment. However, the type  
208 of posttranslational modification of p53 was not analyzed. The authors correlate the nuclear  
209 increase of p53 upon MGO treatment with a decreased migration, invasion and adhesion  
210 phenotype in these cells [10].

211 The application of MGO as a compound to mimic increased glycation in cells is a widely  
212 accepted method particular in the aging research field. Nevertheless, besides the enormous  
213 progress in understanding AGE related phenotypes and diseases in more detail some critical  
214 aspects of MGO treatment arises. It is important that the used concentrations of MGO are  
215 comparable to the actual physiological concentration in this specific tissue and blood  
216 respectively [1]. By using UPLC-MS/MS plasma levels of MGO in healthy individuals have  
217 been estimated at ~60-250 nM, cellular levels ranges from ~1-5  $\mu$ M MGO [1, 32, 33]. In cell  
218 culture model systems often near toxic concentrations of MGO ranging from 50  $\mu$ M up to 2  
219 mM MGO are applied. For instance, HUVEC cells were treated with up to 800  $\mu$ M MGO to  
220 copy injuries in endothelial cells typically seen in diabetes patients knowing that these  
221 concentrations do not reflect the plasma concentrations of MGO even in diabetes patients  
222 [31]. The authors argued that the in vivo situation is rather a complex mixture of compounds  
223 acting in synergy than a single compound leading to this phenotype [31]. In addition, the

224 application of MGO in cell culture is different compared to the in vivo situation and thereby  
225 MGO can act more direct on the cells. To exclude unphysiological responses of MGO  
226 treatment in general, we suggest establishing a protocol for each cell line utilized, which  
227 includes the analysis of the Ser-15 phosphorylated p53 and  $\gamma$ H2AX status to exclude  
228 undesirably effects of MGO which would otherwise overlap with aging mechanisms (Fig 5).

229 **Fig 5. Model of MGO induced stress response.** MGO stress leads to DNA double-strand  
230 breaks, and an immediate increase of phosphorylated p53 in the nucleus of MGO treated cell  
231 lines. The subsequent activation of p53 dependent signaling pathways is supposed to overlap  
232 with the aging response in these cells. We suggest monitoring phosphorylated p53 and  
233  $\gamma$ H2AX in MGO treated cells to exclude undesirable effects of MGO interfering with aging  
234 response.

235

## 236 **Acknowledgement**

237 We thank Dr. Herbert Neuhaus for critical reading the manuscript.

238

## 239 **References**

- 240 1. Schalkwijk, C. and C.D. Stehouwer, *Methylglyoxal, a highly reactive dicarbonyl compound,*  
241 *in diabetes, its vascular complications and other age-related diseases.* Physiol Rev, 2019.
- 242 2. Phillips, S.A. and P.J. Thornalley, *The formation of methylglyoxal from triose phosphates.*  
243 *Investigation using a specific assay for methylglyoxal.* Eur J Biochem, 1993. **212**(1): p. 101-  
244 5.

- 245 3. Thornalley, P.J., *Modification of the glyoxalase system in human red blood cells by glucose*  
246 *in vitro*. *Biochem J*, 1988. **254**(3): p. 751-5.
- 247 4. Chakraborty, S., K. Karmakar, and D. Chakravorty, *Cells producing their own nemesis:*  
248 *understanding methylglyoxal metabolism*. *IUBMB Life*, 2014. **66**(10): p. 667-78.
- 249 5. Vistoli, G., et al., *Advanced glycoxidation and lipoxidation end products (AGEs and ALEs):*  
250 *an overview of their mechanisms of formation*. *Free Radic Res*, 2013. **47 Suppl 1**: p. 3-27.
- 251 6. Nigro, C., et al., *Dicarbonyl Stress at the Crossroads of Healthy and Unhealthy Aging*. *Cells*,  
252 2019. **8**(7).
- 253 7. Tessitore, L., et al., *Effect of two aliphatic aldehydes, methylglyoxal and 4-hydroxypentenal,*  
254 *on the growth of Yoshida ascites hepatoma AH-130*. *Chem Biol Interact*, 1989. **70**(3-4): p.  
255 227-40.
- 256 8. Ravichandran, M., et al., *Impairing L-Threonine Catabolism Promotes Healthspan through*  
257 *Methylglyoxal-Mediated Proteohormesis*. *Cell Metab*, 2018. **27**(4): p. 914-925 e5.
- 258 9. Bellahcene, A., et al., *Methylglyoxal-derived stress: An emerging biological factor involved*  
259 *in the onset and progression of cancer*. *Semin Cancer Biol*, 2018. **49**: p. 64-74.
- 260 10. Loarca, L., S. Sassi-Gaha, and C.M. Artlett, *Two alpha-dicarbonyls downregulate migration,*  
261 *invasion, and adhesion of liver cancer cells in a p53-dependent manner*. *Dig Liver Dis*,  
262 2013. **45**(11): p. 938-46.
- 263 11. Nigro, J.M., et al., *Mutations in the p53 gene occur in diverse human tumour types*.  
264 *Nature*, 1989. **342**(6250): p. 705-8.
- 265 12. Appella, E. and C.W. Anderson, *Post-translational modifications and activation of p53 by*  
266 *genotoxic stresses*. *Eur J Biochem*, 2001. **268**(10): p. 2764-72.
- 267 13. Canman, C.E. and D.S. Lim, *The role of ATM in DNA damage responses and cancer*.  
268 *Oncogene*, 1998. **17**(25): p. 3301-8.
- 269 14. Shieh, S.Y., et al., *DNA damage-induced phosphorylation of p53 alleviates inhibition by*  
270 *MDM2*. *Cell*, 1997. **91**(3): p. 325-34.
- 271 15. Milczarek, G.J., J. Martinez, and G.T. Bowden, *p53 Phosphorylation: biochemical and*  
272 *functional consequences*. *Life Sci*, 1997. **60**(1): p. 1-11.
- 273 16. Amicarelli, F., et al., *Scavenging system efficiency is crucial for cell resistance to ROS-*  
274 *mediated methylglyoxal injury*. *Free Radic Biol Med*, 2003. **35**(8): p. 856-71.
- 275 17. Tamae, D., et al., *Mutagenesis and repair induced by the DNA advanced glycation end*  
276 *product N2-1-(carboxyethyl)-2'-deoxyguanosine in human cells*. *Biochemistry*, 2011.  
277 **50**(12): p. 2321-9.
- 278 18. Kuo, L.J. and L.X. Yang, *Gamma-H2AX - a novel biomarker for DNA double-strand breaks*.  
279 *In Vivo*, 2008. **22**(3): p. 305-9.
- 280 19. Tewari, M., et al., *Yama/PPP32 beta, a mammalian homolog of CED-3, is a CrmA-*  
281 *inhibitable protease that cleaves the death substrate poly(ADP-ribose) polymerase*. *Cell*,

- 282 1995. **81**(5): p. 801-9.
- 283 20. Kruiswijk, F., C.F. Labuschagne, and K.H. Vousden, *p53 in survival, death and metabolic*  
284 *health: a lifeguard with a licence to kill*. Nat Rev Mol Cell Biol, 2015. **16**(7): p. 393-405.
- 285 21. Lane, D. and A. Levine, *p53 Research: the past thirty years and the next thirty years*. Cold  
286 Spring Harb Perspect Biol, 2010. **2**(12): p. a000893.
- 287 22. Vogelstein, B., *Cancer. A deadly inheritance*. Nature, 1990. **348**(6303): p. 681-2.
- 288 23. Hollstein, M., et al., *p53 mutations in human cancers*. Science, 1991. **253**(5015): p. 49-53.
- 289 24. Olivier, M., M. Hollstein, and P. Hainaut, *TP53 mutations in human cancers: origins,*  
290 *consequences, and clinical use*. Cold Spring Harb Perspect Biol, 2010. **2**(1): p. a001008.
- 291 25. Robles, A.I. and C.C. Harris, *Clinical outcomes and correlates of TP53 mutations and*  
292 *cancer*. Cold Spring Harb Perspect Biol, 2010. **2**(3): p. a001016.
- 293 26. Vousden, K.H. and X. Lu, *Live or let die: the cell's response to p53*. Nat Rev Cancer, 2002.  
294 **2**(8): p. 594-604.
- 295 27. Casey, G., et al., *Growth suppression of human breast cancer cells by the introduction of a*  
296 *wild-type p53 gene*. Oncogene, 1991. **6**(10): p. 1791-7.
- 297 28. Lehman, T.A., et al., *p53 mutations in human immortalized epithelial cell lines*.  
298 Carcinogenesis, 1993. **14**(5): p. 833-9.
- 299 29. Davidoff, A.M., et al., *Expression of p53 in human neuroblastoma- and neuroepithelioma-*  
300 *derived cell lines*. Oncogene, 1992. **7**(1): p. 127-33.
- 301 30. Jia, L.Q., et al., *Screening the p53 status of human cell lines using a yeast functional assay*.  
302 Mol Carcinog, 1997. **19**(4): p. 243-53.
- 303 31. Braun, J.D., et al., *Methylglyoxal down-regulates the expression of cell cycle associated*  
304 *genes and activates the p53 pathway in human umbilical vein endothelial cells*. Sci Rep,  
305 2019. **9**(1): p. 1152.
- 306 32. Rabbani, N. and P.J. Thornalley, *Measurement of methylglyoxal by stable isotopic dilution*  
307 *analysis LC-MS/MS with corroborative prediction in physiological samples*. Nat Protoc,  
308 2014. **9**(8): p. 1969-79.
- 309 33. Scheijen, J.L. and C.G. Schalkwijk, *Quantification of glyoxal, methylglyoxal and 3-*  
310 *deoxyglucosone in blood and plasma by ultra performance liquid chromatography*  
311 *tandem mass spectrometry: evaluation of blood specimen*. Clin Chem Lab Med, 2014.  
312 **52**(1): p. 85-91.

## 313 **Supporting information**

314 **S1 Fig. Analysis of the expression and localization of phospho-p53 in primary human**  
315 **fibroblasts after treatment with MGO.** Representative images of primary human

316 fibroblasts treated with indicated MGO concentrations for 1h (A) and 18 h (B). The cells  
317 were stained for phospho-p53 together with phalloidin (F-actin). Merged images show  
318 phospho-p53 (green) and F-actin (red). Scale bars, 20  $\mu$ m.

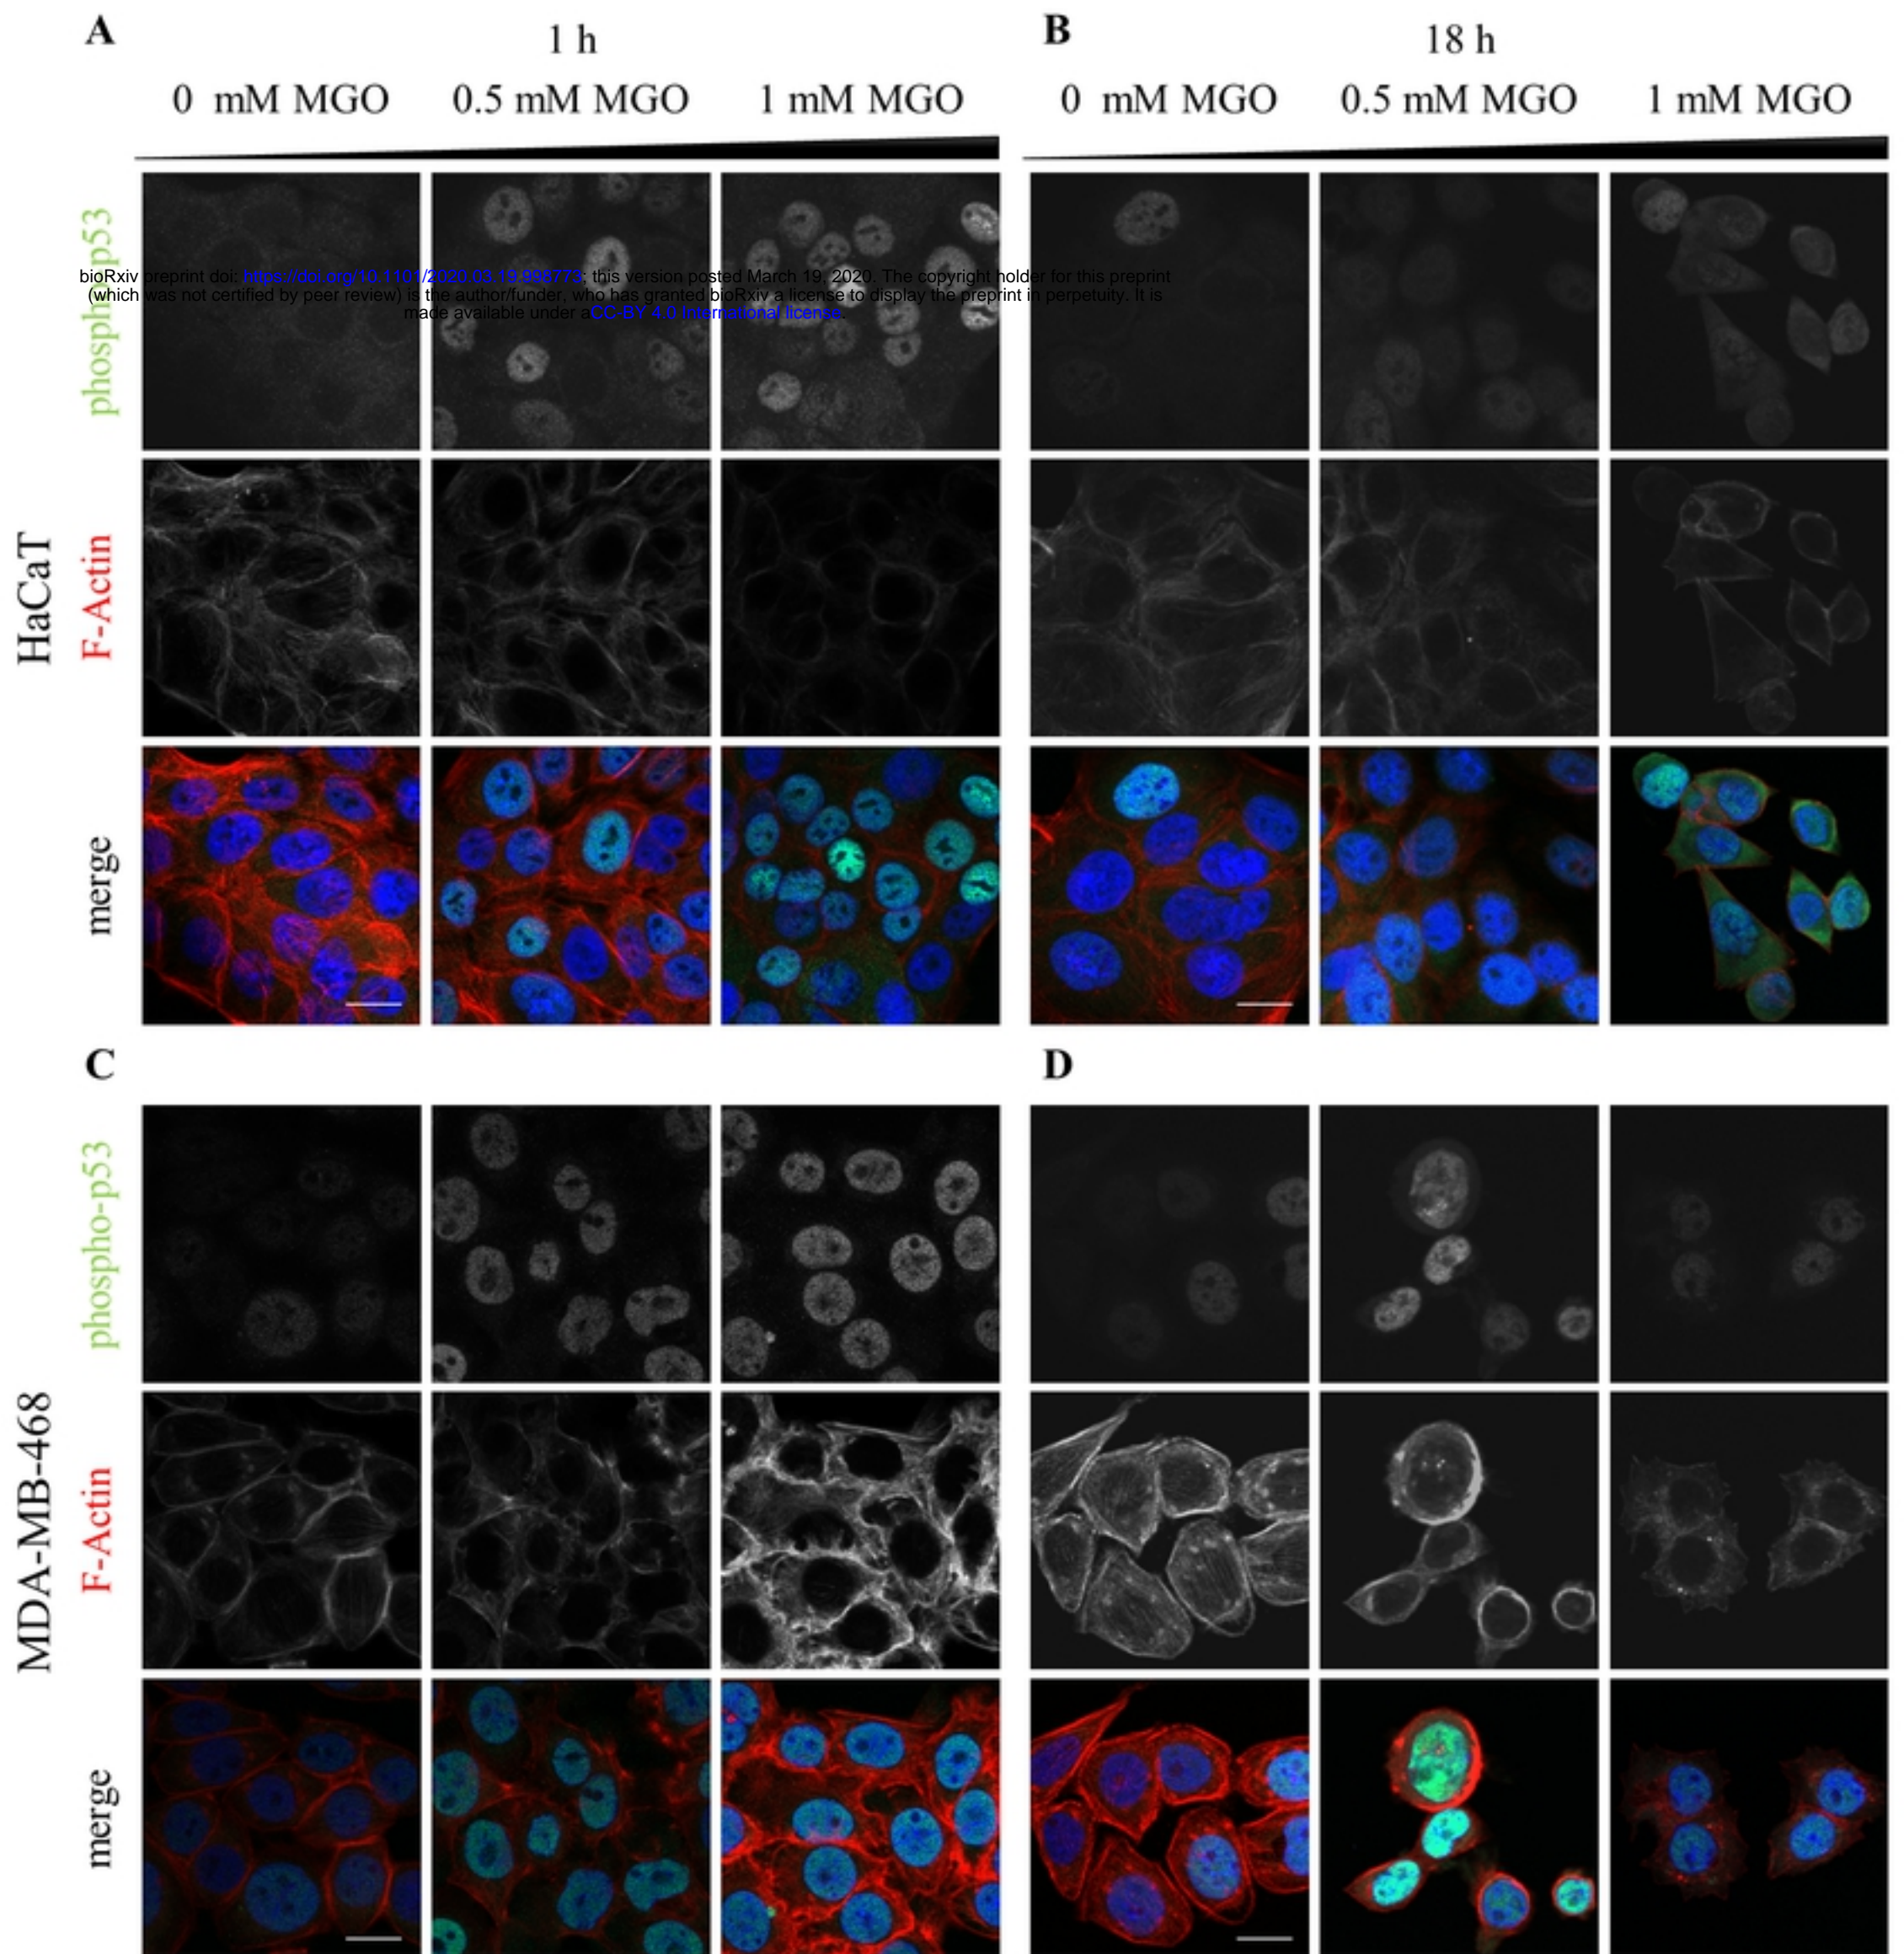

Fig 1

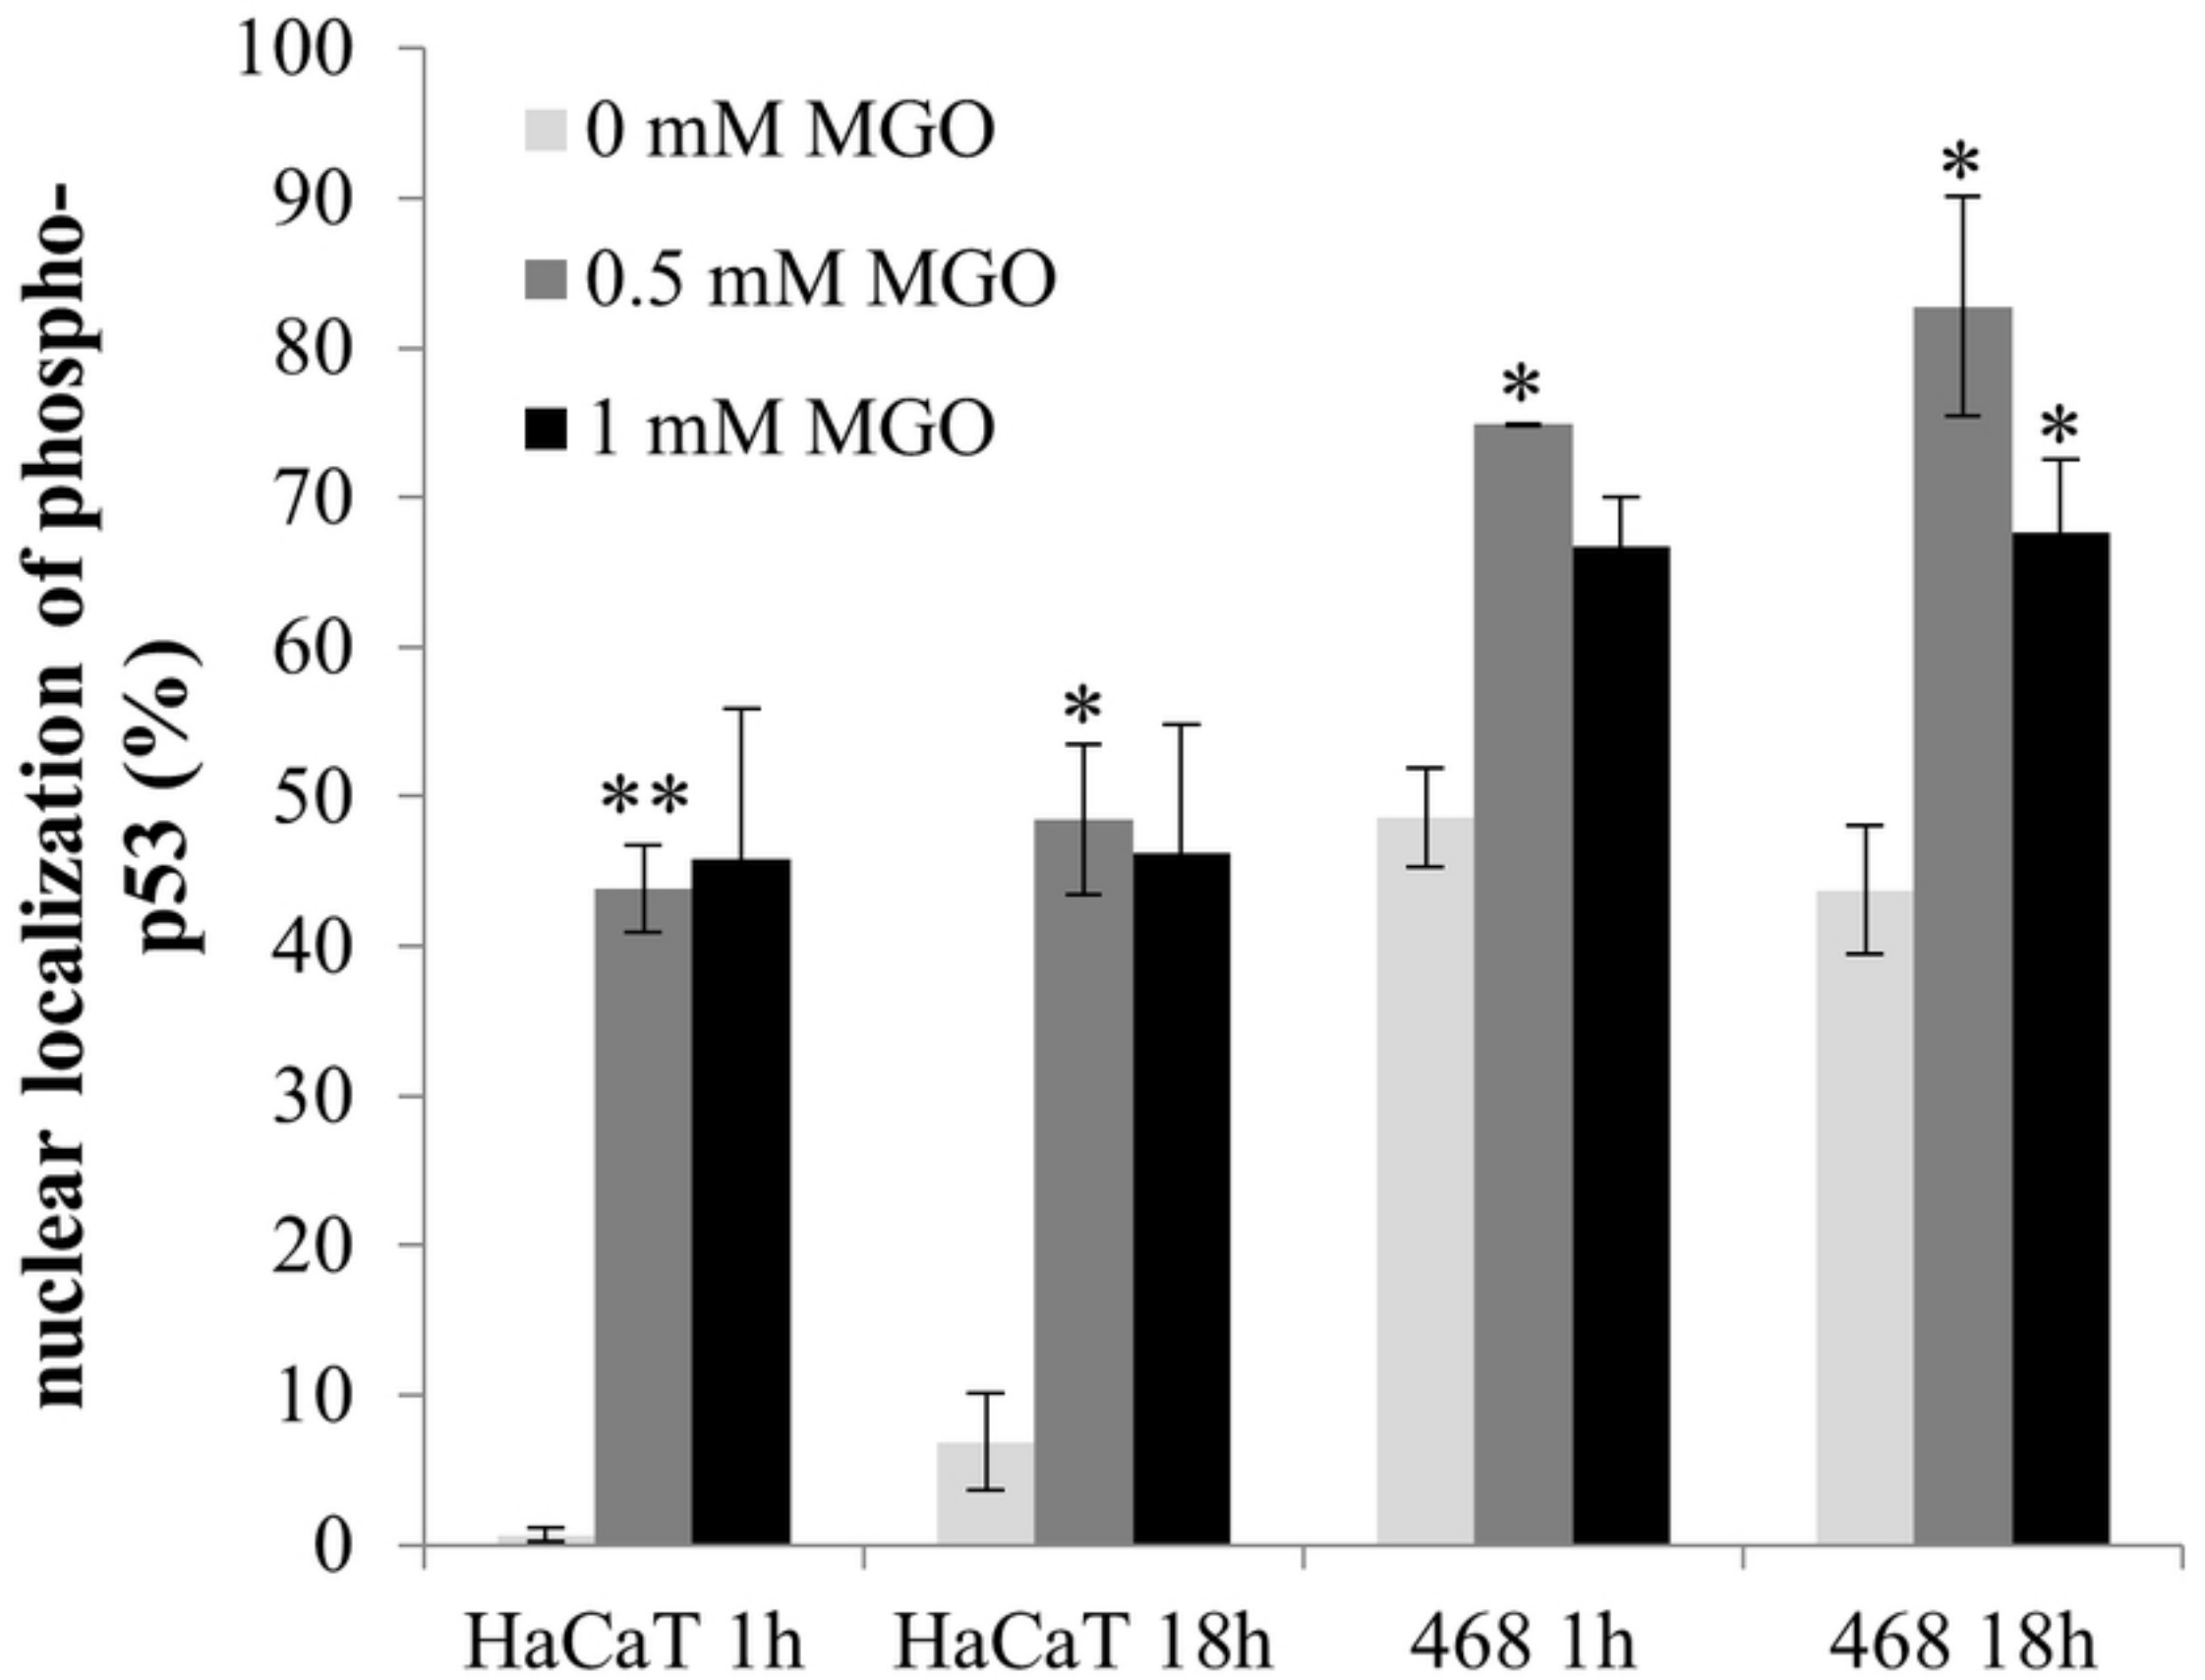

Fig 2



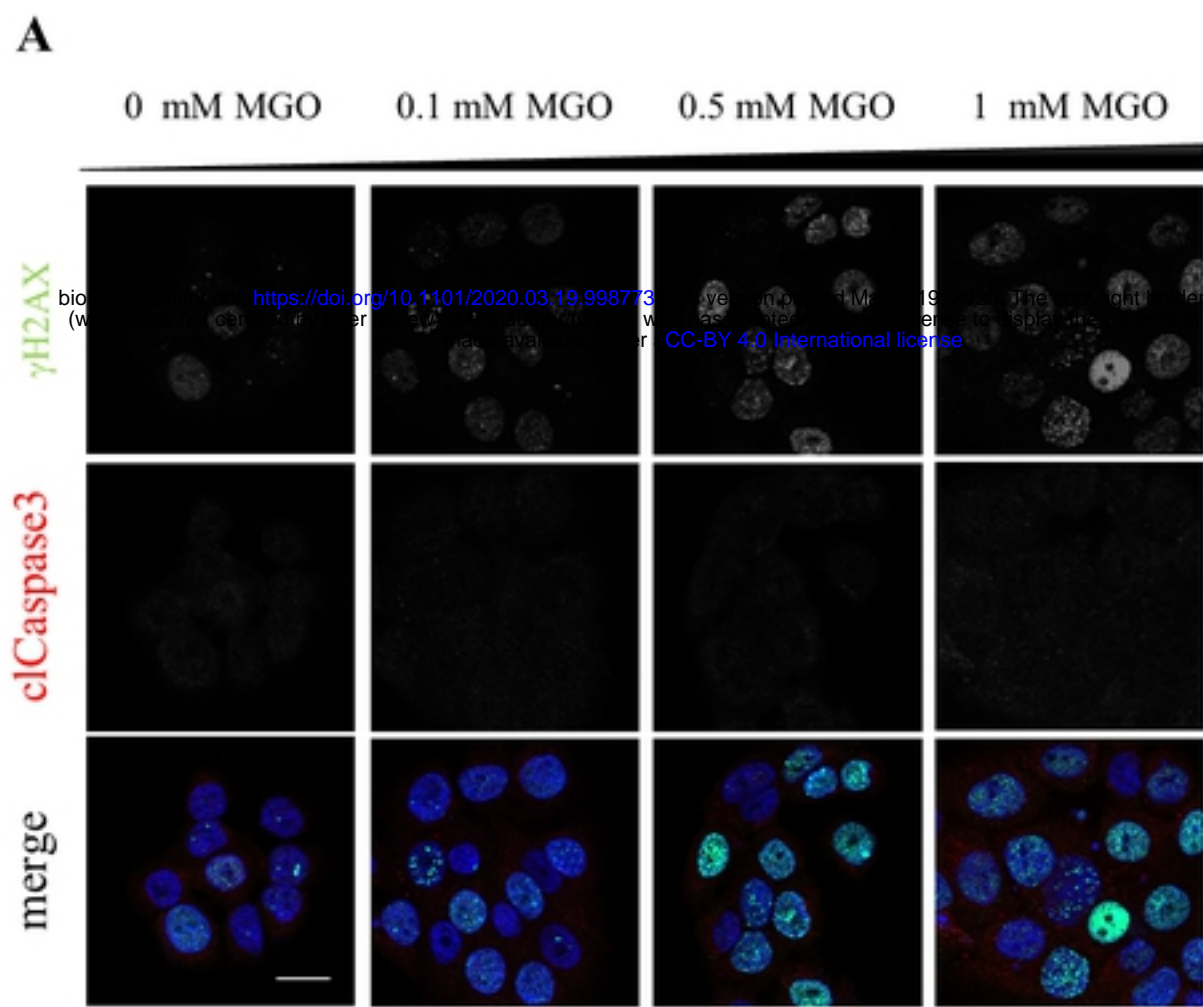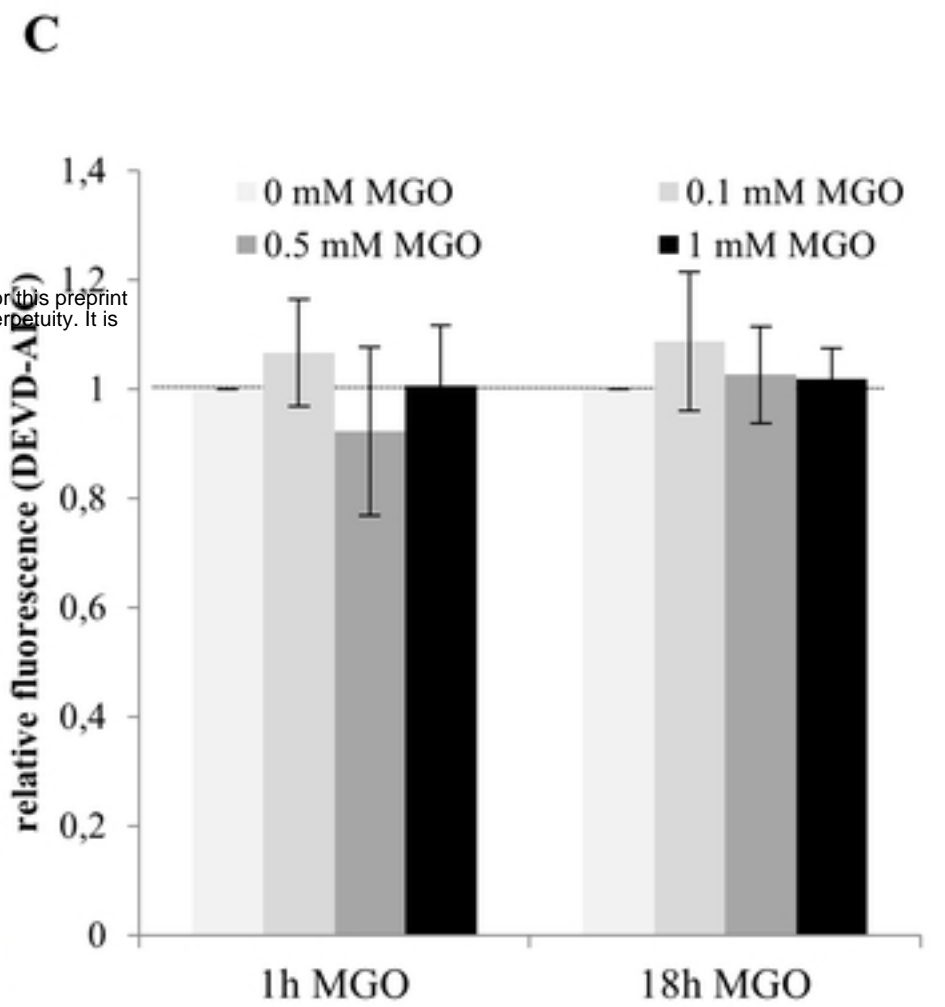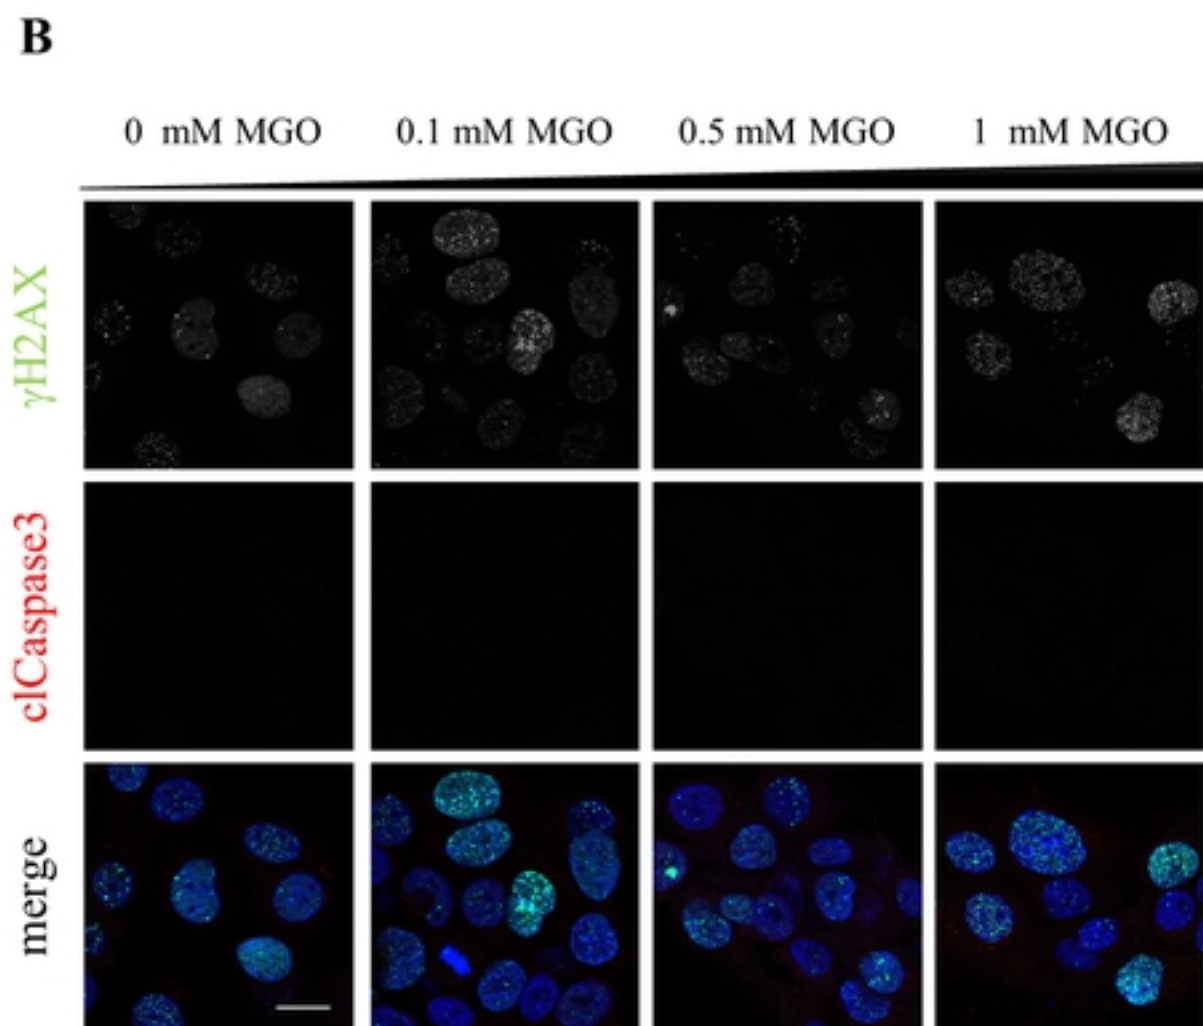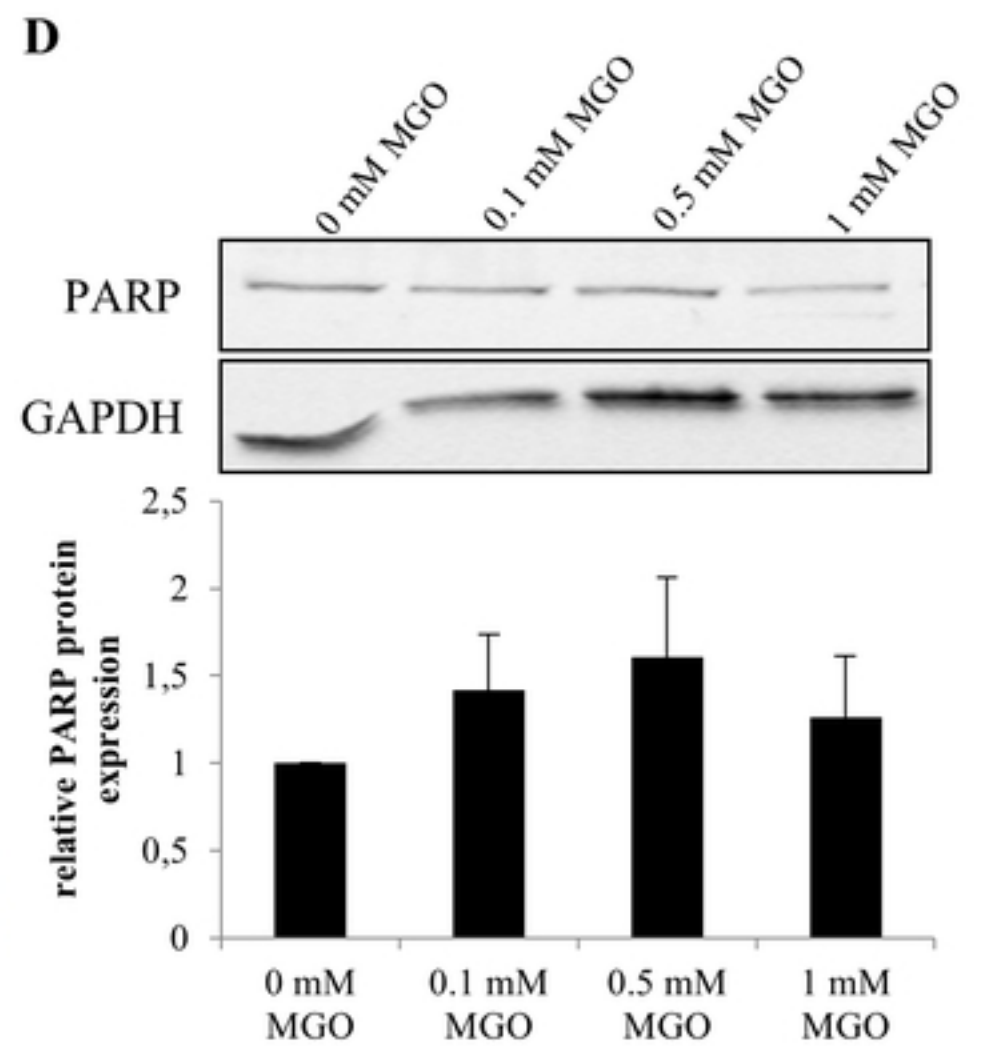

Fig 3

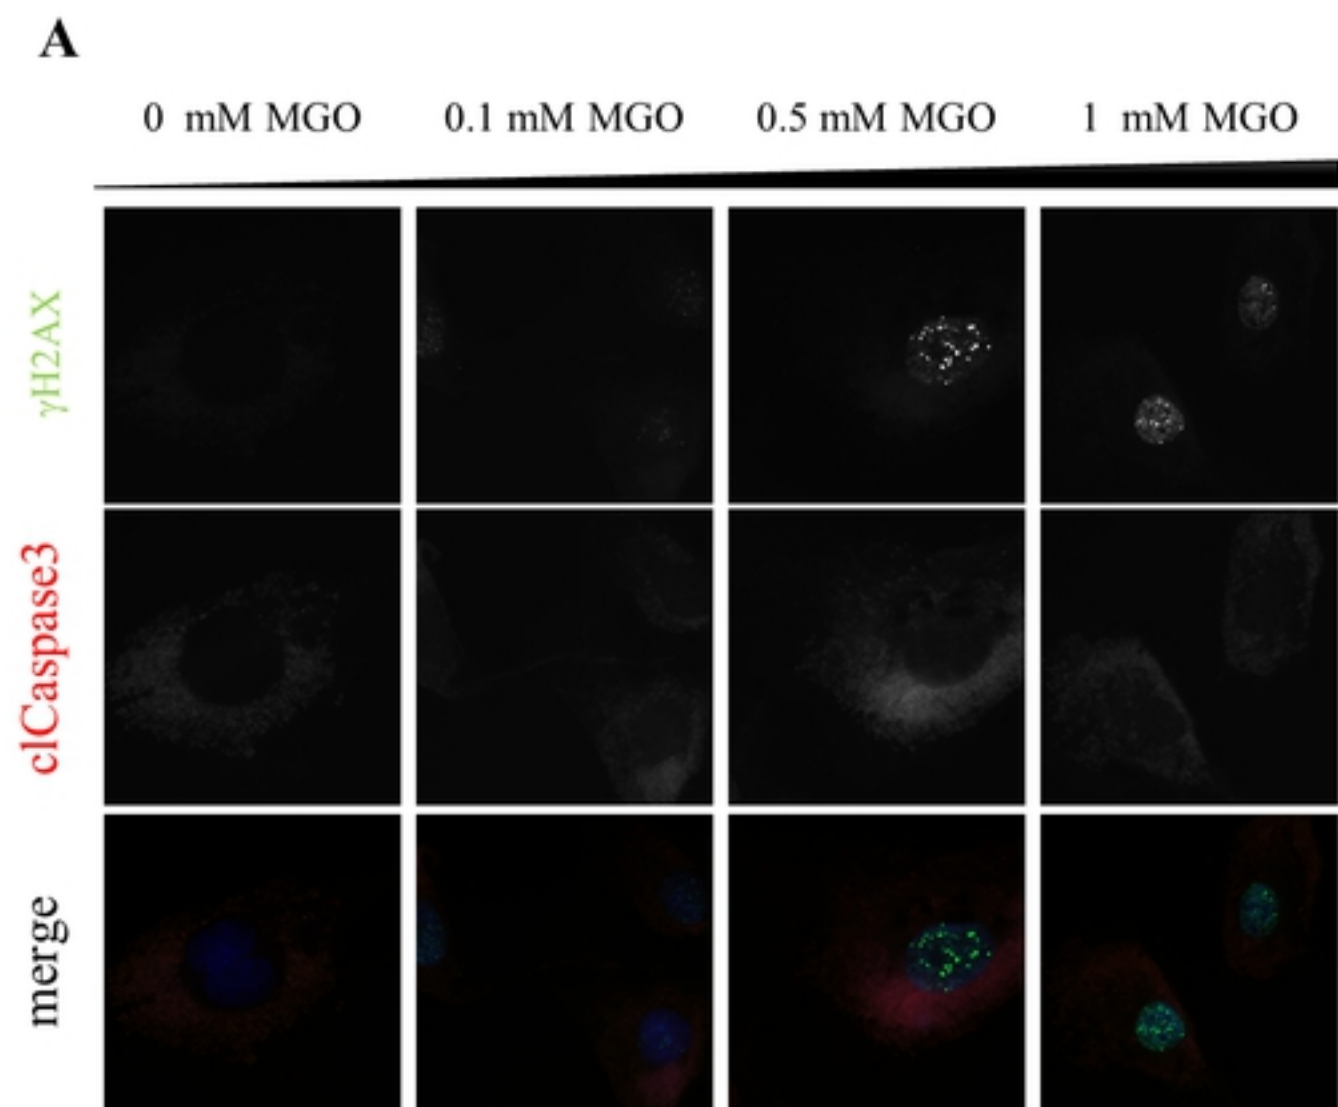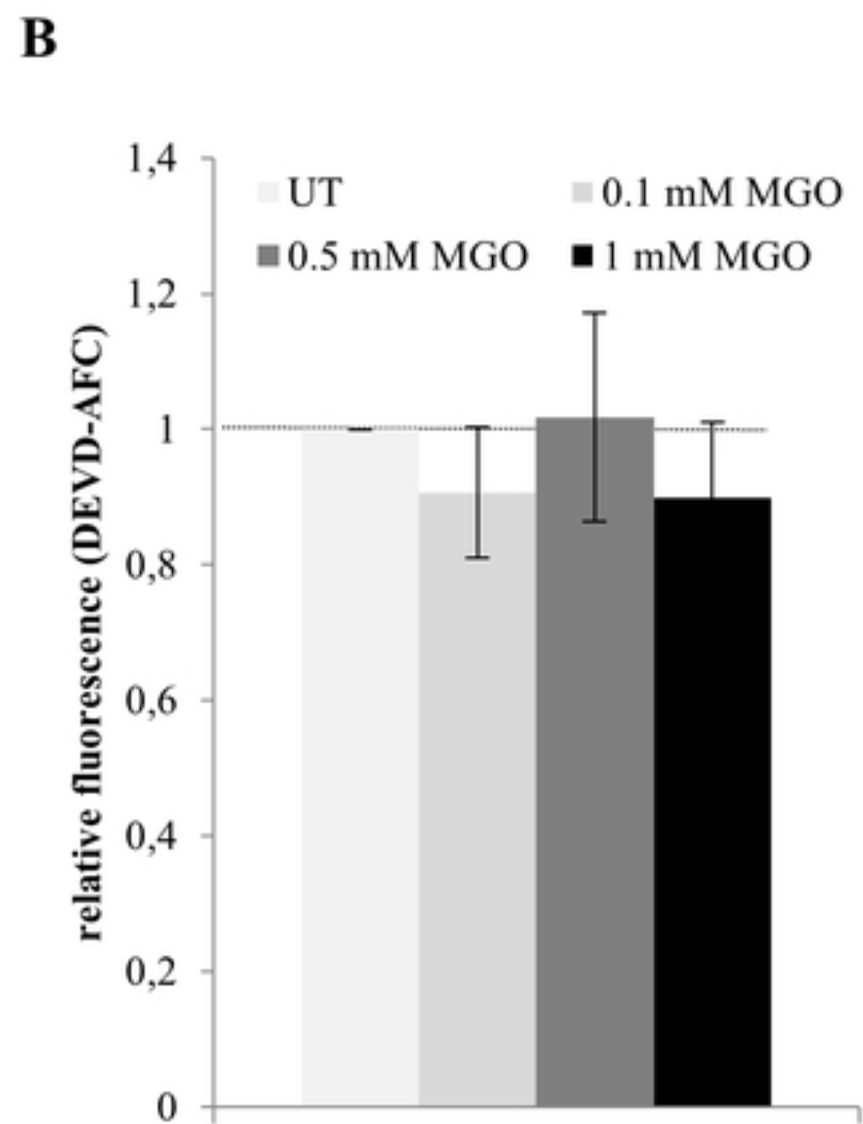

Fig 4

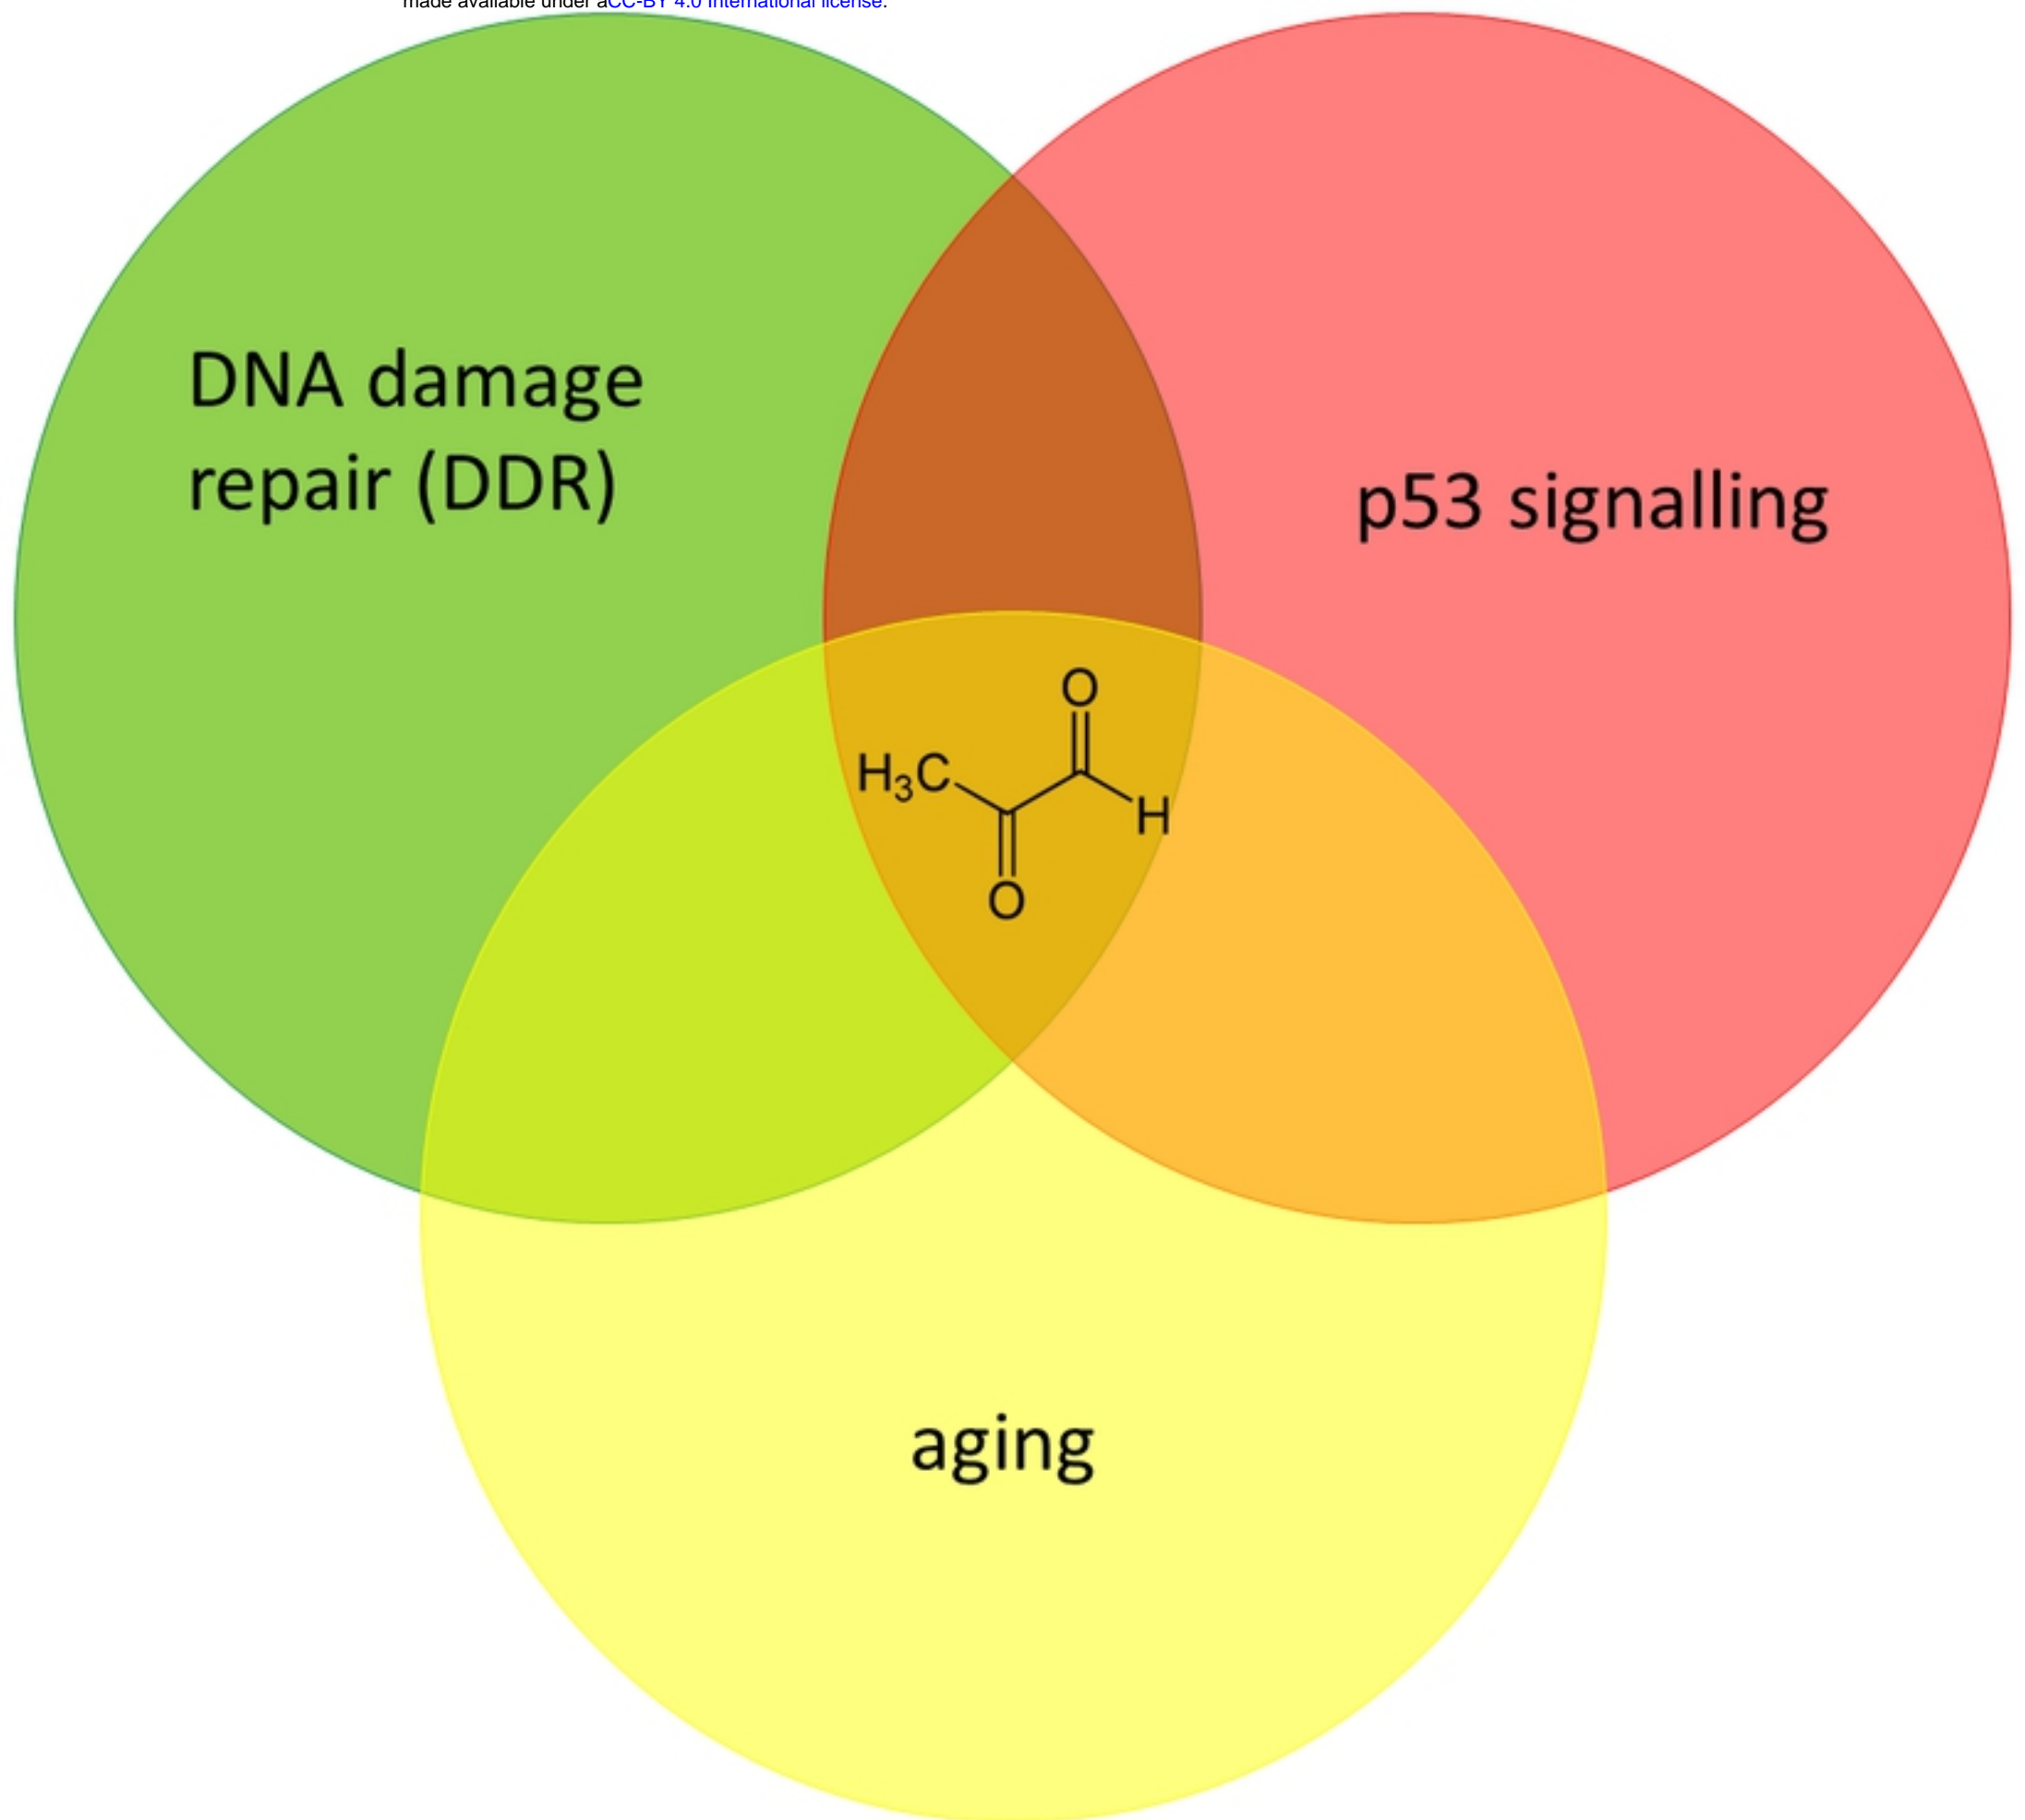

Fig 5
